# Supplementary material
Source: PubMed Central journal article supplement (PMC6361668)
Supplement: NIHMS1003543-supplement-3.pdf [file NIHMS1003543-supplement-3.pdf]

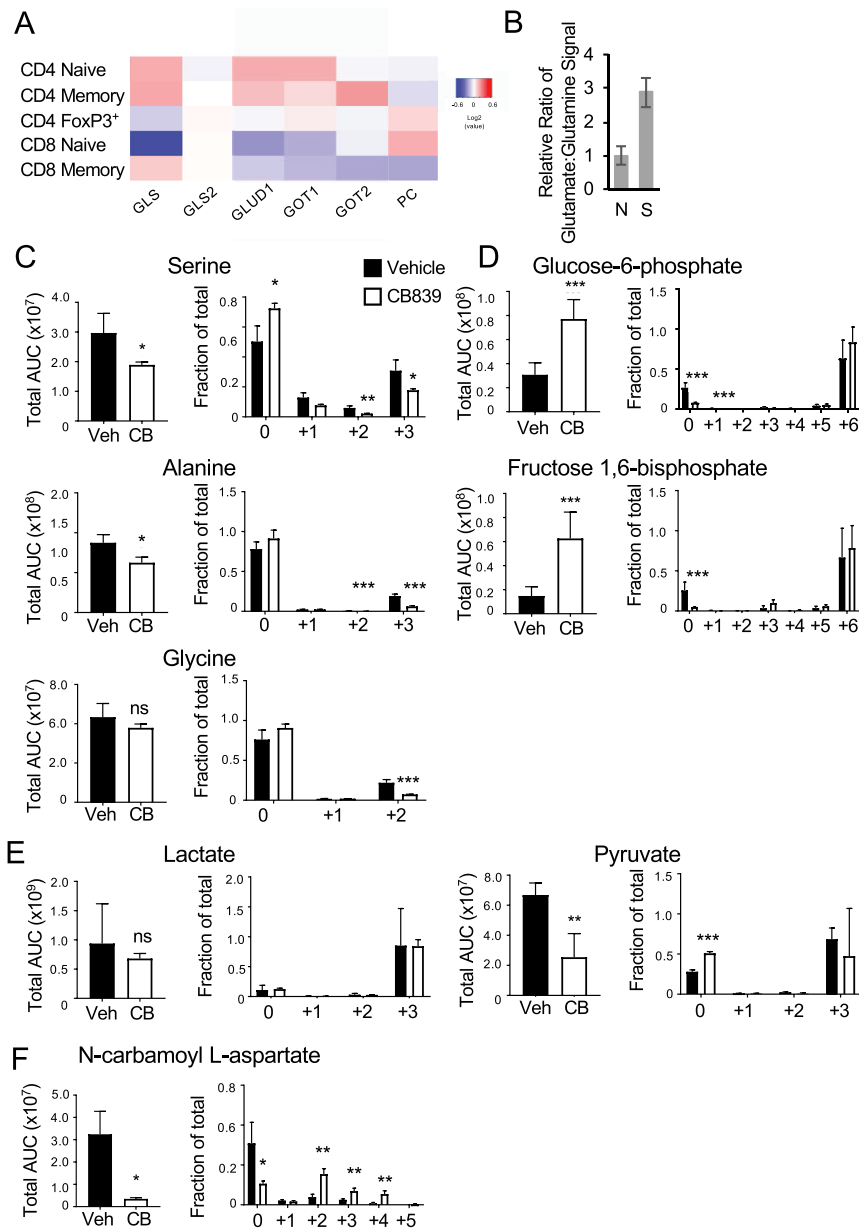

**Figure S1. Glutamine Conversion to Glutamate Contributes to T Cell Metabolism, Related to Figure 1**

(A) Relative expression of glutamine pathway genes, data from Immgen ([immgen.org](http://immgen.org)).

(B) Relative ratio of glutamate:glutamine metabolite levels normalized to IL-7 (naive, N)  $\alpha$ CD3/CD28 (stimulated, S) normalized to naive in wild-type CD4<sup>+</sup> T cells.

(C–F) Additional intracellular metabolite abundance (left) and fraction labeled from <sup>13</sup>C-glucose (right). (C) Amino acids Serine, alanine, and glycine. (D) Glycolytic intermediates G6P, F16BP. (E) Lactate and Pyruvate. (F) Nucleotide precursor N-carbamoyl L-aspartate (average of n = 3 replicates/group). Means  $\pm$  Std dev, (total abundance, left, \*\*\*p < 0.001, Student's t test; fractional labeling, right, \*\*\*p < 0.001, one way ANOVA).

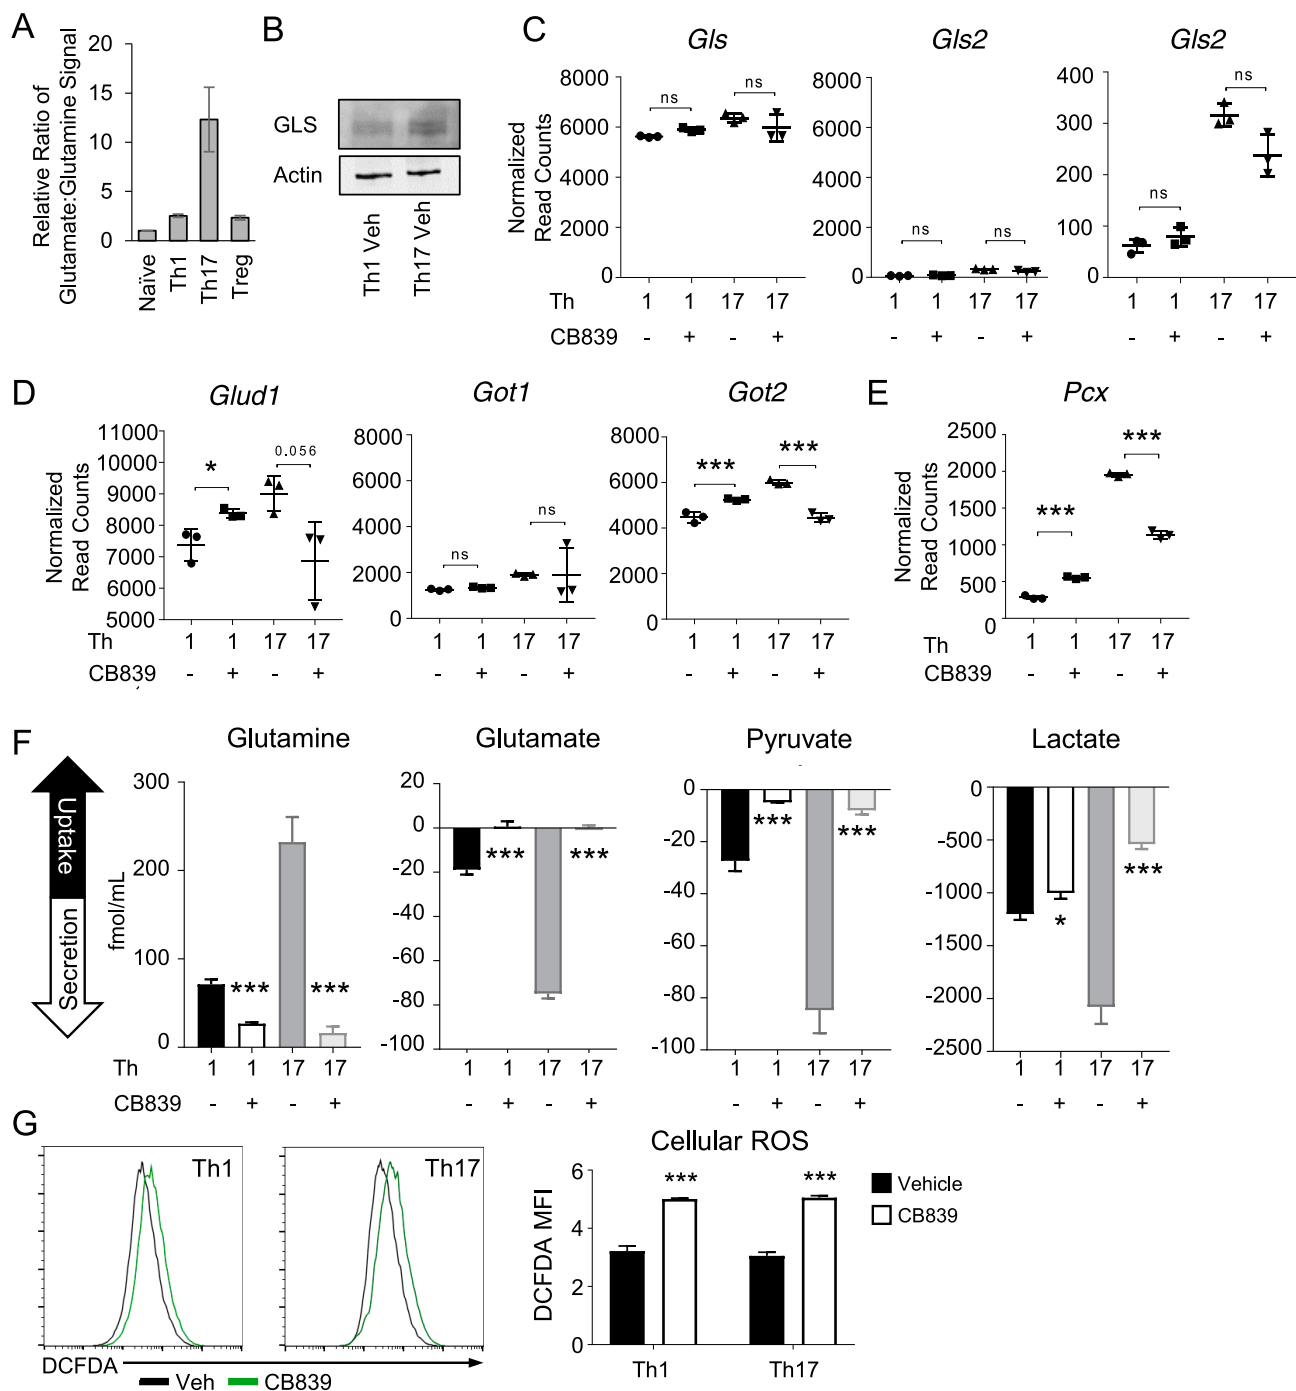

**Figure S2. Glutamine and the Role of GLS in Th1 and Th17 Cell Metabolism, Related to Figure 2**

(A) Relative ratio of intracellular metabolites glutamate:glutamine from CD4<sup>+</sup> T cells in Th1, Th17, and Treg skewing conditions normalized to naive (average n = 3 replicates/group).

(B) Immunoblot of GLS protein (top) and actin control (bottom) in T cells after five days in Th1 and Th17 skewing conditions.

(C–E) Normalized counts of message from RNA-Seq. (C) *Glu* enzyme RNA expression from RNA-Seq from Figure 2D. *Glu2* expression from RNA-Seq from Figure 2D on the same scale as *Glu* expression (left) and in smaller scale (right). For all RNA-Seq expression data, P values are determined from RNA-Seq analysis, all groups run in triplicate. (D) *Glut1*, *Got1*, and *Got2* expression as in (C). (E) *Pcx* RNA expression as in (C) (All p values from defSeq2 program, n = 3 replicates/group).

(legend continued on next page)

---

(F) Uptake (positive numbers) and secretion (negative numbers) of metabolites in CB839 treated wild-type CD4<sup>+</sup> T cells in Th1 and Th17 skewing conditions as measured by Nuclear Magnetic Resonance (NMR) (average of 3 replicates, \*\*\*p < 0.001, unpaired t test).

(G) Fluorescence of DCFDA dye by flow cytometry, representative histograms (left) and average of n = 3 replicates (right, \*\*\*p < 0.001, Student's t test) of vehicle or CB839-treated T cells in Th1 and Th17 skewing conditions.

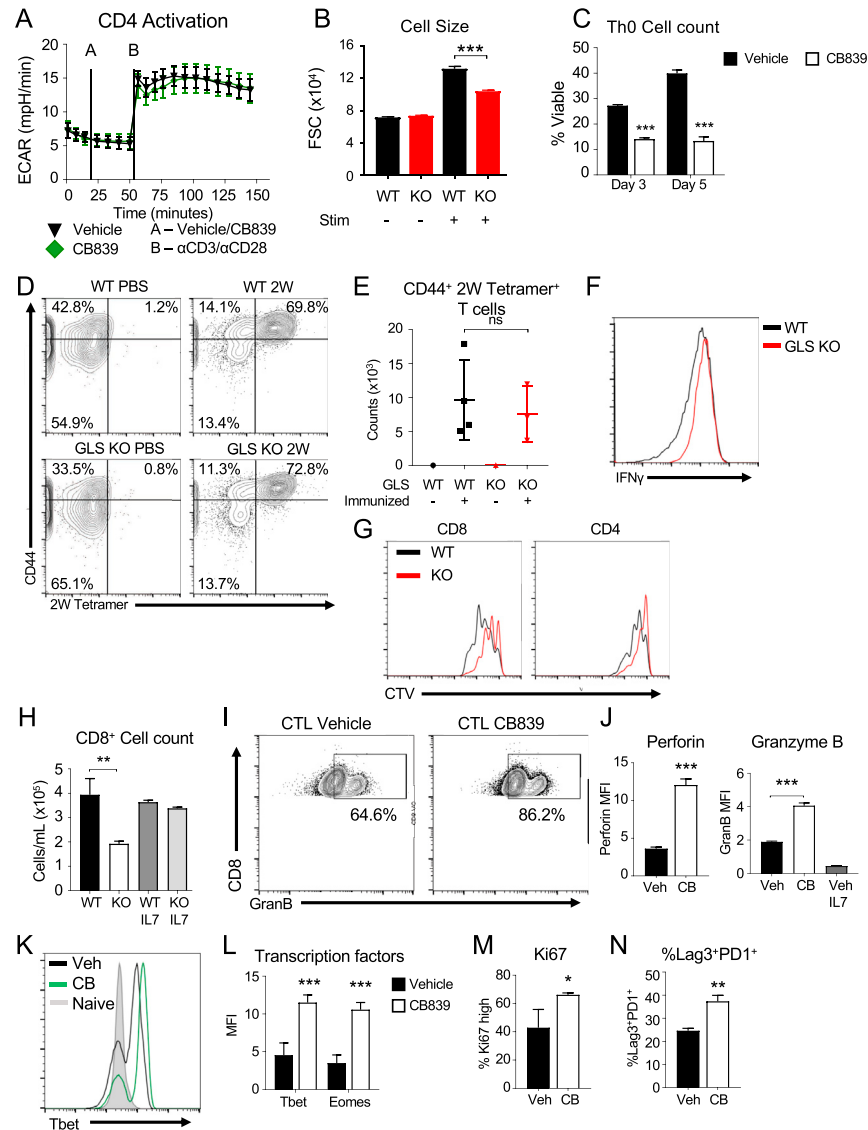

**Figure S3. GLS Deficiency Does Not Alter Resting T Cell Phenotype but Enhances Th1 and CD8<sup>+</sup> T Cell Differentiation and Cytokine Production, Related to Figure 3**

(A) Extracellular Acidification Rate (ECAR) of naive CD4<sup>+</sup> T cells treated with vehicle or CB839 as measured by Seahorse (n = 4 replicates/group).

(B) Average MFI of forward scatter (FSC) in activated CD8<sup>+</sup> WT and GLS KO T cells (\*\*\*p < 0.001, Student's t test, replicates of n = 3/group).

(C) Viability by propidium iodide staining at day 3 and day 5 of WT T cells in activation condition with no cytokines (\*\*\*p < 0.001, Student's t test, average of n = 3 replicates).

(D–F) 2W peptide immunization of WT and GLS KO. (D) Percent 2W-MHC II tetramer<sup>+</sup> and CD44<sup>+</sup> T cells by flow cytometry in both spleen and inguinal lymph nodes eight days after immunization with 2W antigen + CFA (right) or PBS control (left) in WT and GLS KO animals. (E) Average count of CD44<sup>+</sup> Tetramer<sup>+</sup> T cells as in (D) (p > 0.05, Student's t test). (F) IFN $\gamma$  protein expression by flow from CD44<sup>+</sup> MHC II tetramer<sup>+</sup> T cells isolated from WT and GLS KO spleen and lymph nodes. (G) Homeostatic proliferation of WT and GLS KO CD4/CD8<sup>+</sup> T cells stained with cell trace violet (CTV) and injected into RAG1 KO recipient mice after five days (representative of n = 5 replicates/group).

(H) Cell counts of CD8<sup>+</sup> T cells from WT and GLS KO animals activated on  $\alpha$ CD3/CD28+IL2 for five days (\*\*p < 0.01, Student's t test).

(I–N) CD8<sup>+</sup> T cells activated  $\alpha$ CD3/CD28+IL2 for five days in the presence of CB839 or vehicle. (I) Representative FACS plots of granzyme B producing cells, (J) Perforin MFI (left) or granzyme B MFI (right) (\*\*\*p < 0.001, Student's t test). (K) Representative Tbet expression, (L) Average transcription factor expression (\*\*\*p < 0.001, Student's t test, n = 3 replicates), (M) Ki67 expression, (N) Percent Lag3<sup>+</sup> and PD1<sup>+</sup> T cells as in (I). (\*p < 0.01, \*\*p < 0.01, Student's t test, average of n = 3 replicates).

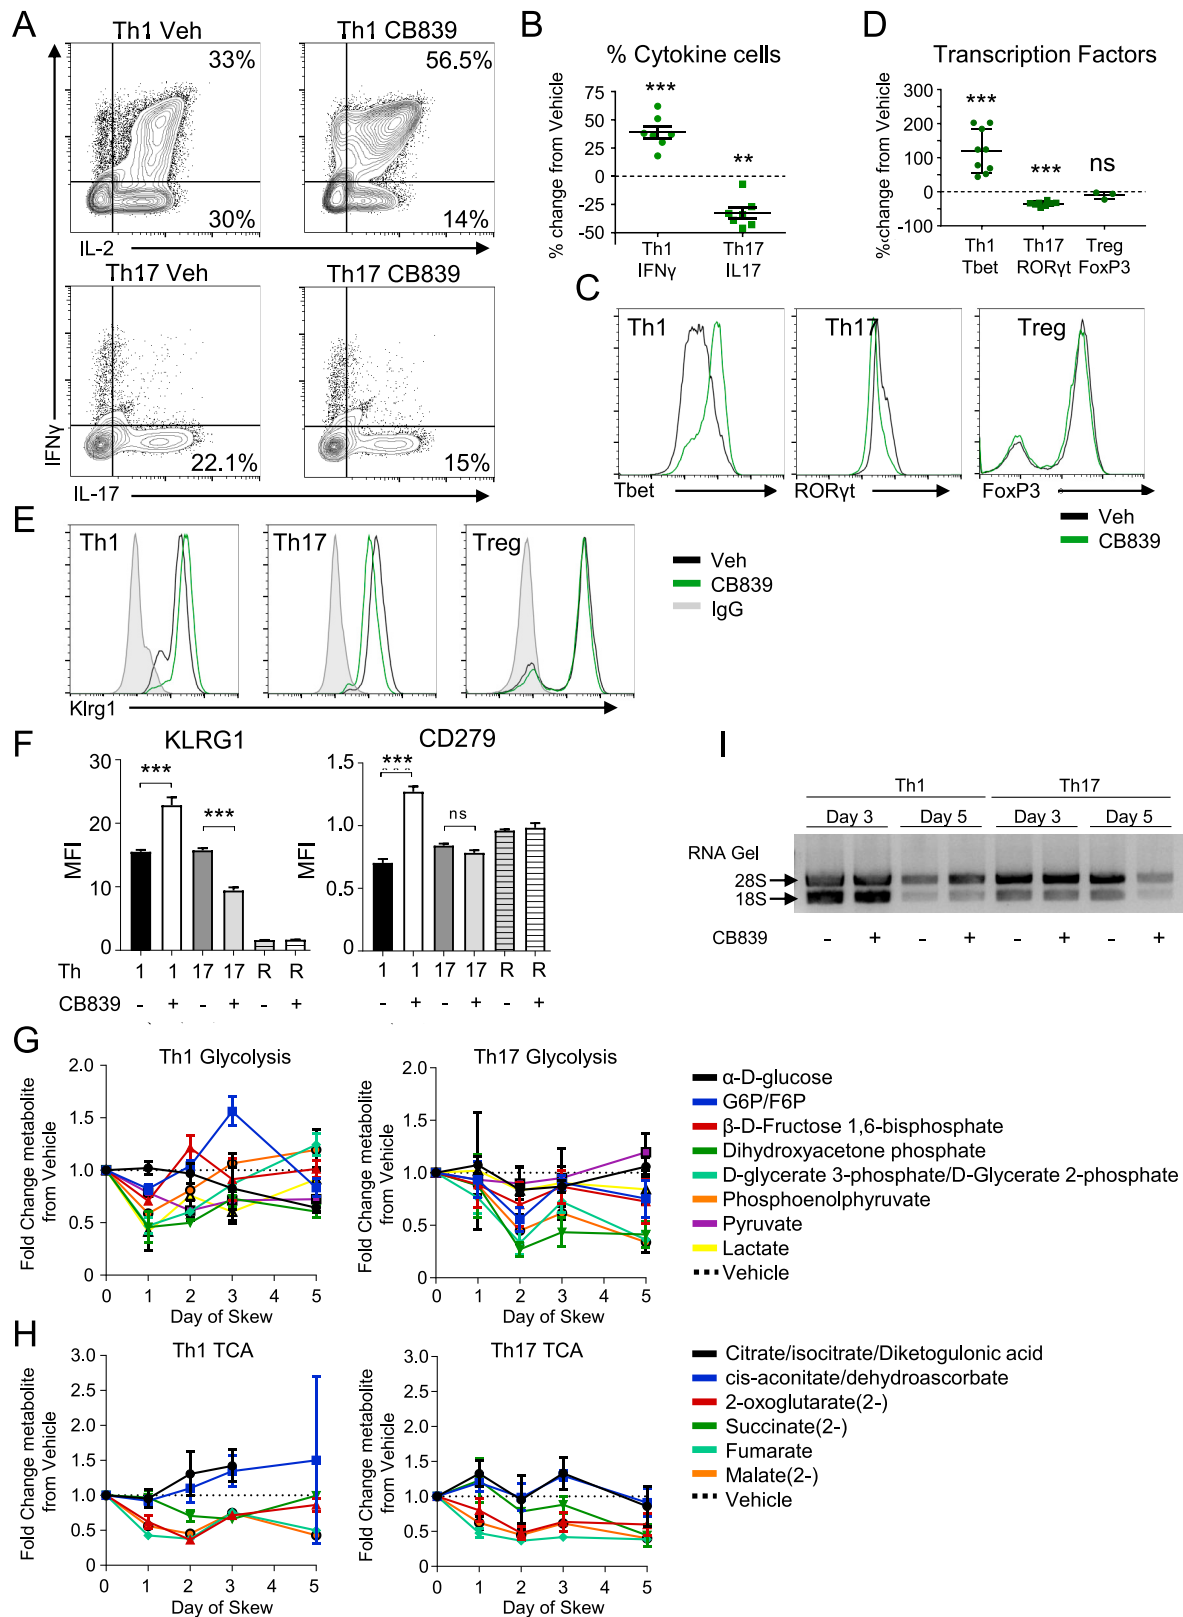

(legend on next page)

---

**Figure S4. CB839 Inhibition Phenocopies GLS KO *In Vitro*, Related to Figure 4**

(A–F) Naive CD4<sup>+</sup> T cells from WT differentiated in Th1, Th17, or Treg skewing media over five days in the presence of CB839 or vehicle as in Figure 4A. (A) IFN $\gamma$  and IL2 production in Th1 skewing conditions (top) and IL-17 production in Th17 skewing conditions (bottom) (representative of n = 3 replicates/group). (B) Percent change cytokine producers in Th1 and Th17 cells from vehicle (Th1, Th17 n = 9 experiments, \*\*\*p < 0.001, Student's t test). (C) Transcription factor expression in wild-type cells treated with Vehicle or CB839 (Tbet and ROR $\gamma$ t, n = 9 experiments, Foxp3 n = 3 experiments). (D) Average percent change from WT of transcription factor expression (Th1, Th17 n = 7 experiments, Treg n = 3 experiments, \*\*\*p < 0.001, one-sample t test). (E) Representative Klrp1 protein expression and (F) average Klrp1 and CD279 expression (\*\*\*p < 0.001, Student's t test). (G and H) Metabolites in glycolysis (H) and Tricarboxylic Acid cycle (I) as in Figures 3I–3J (average of 3 replicates/group fold change from vehicle). (I) Total RNA extracted from cells as in (A) at day 3 and day 5 (representative of n = 2 experiments).

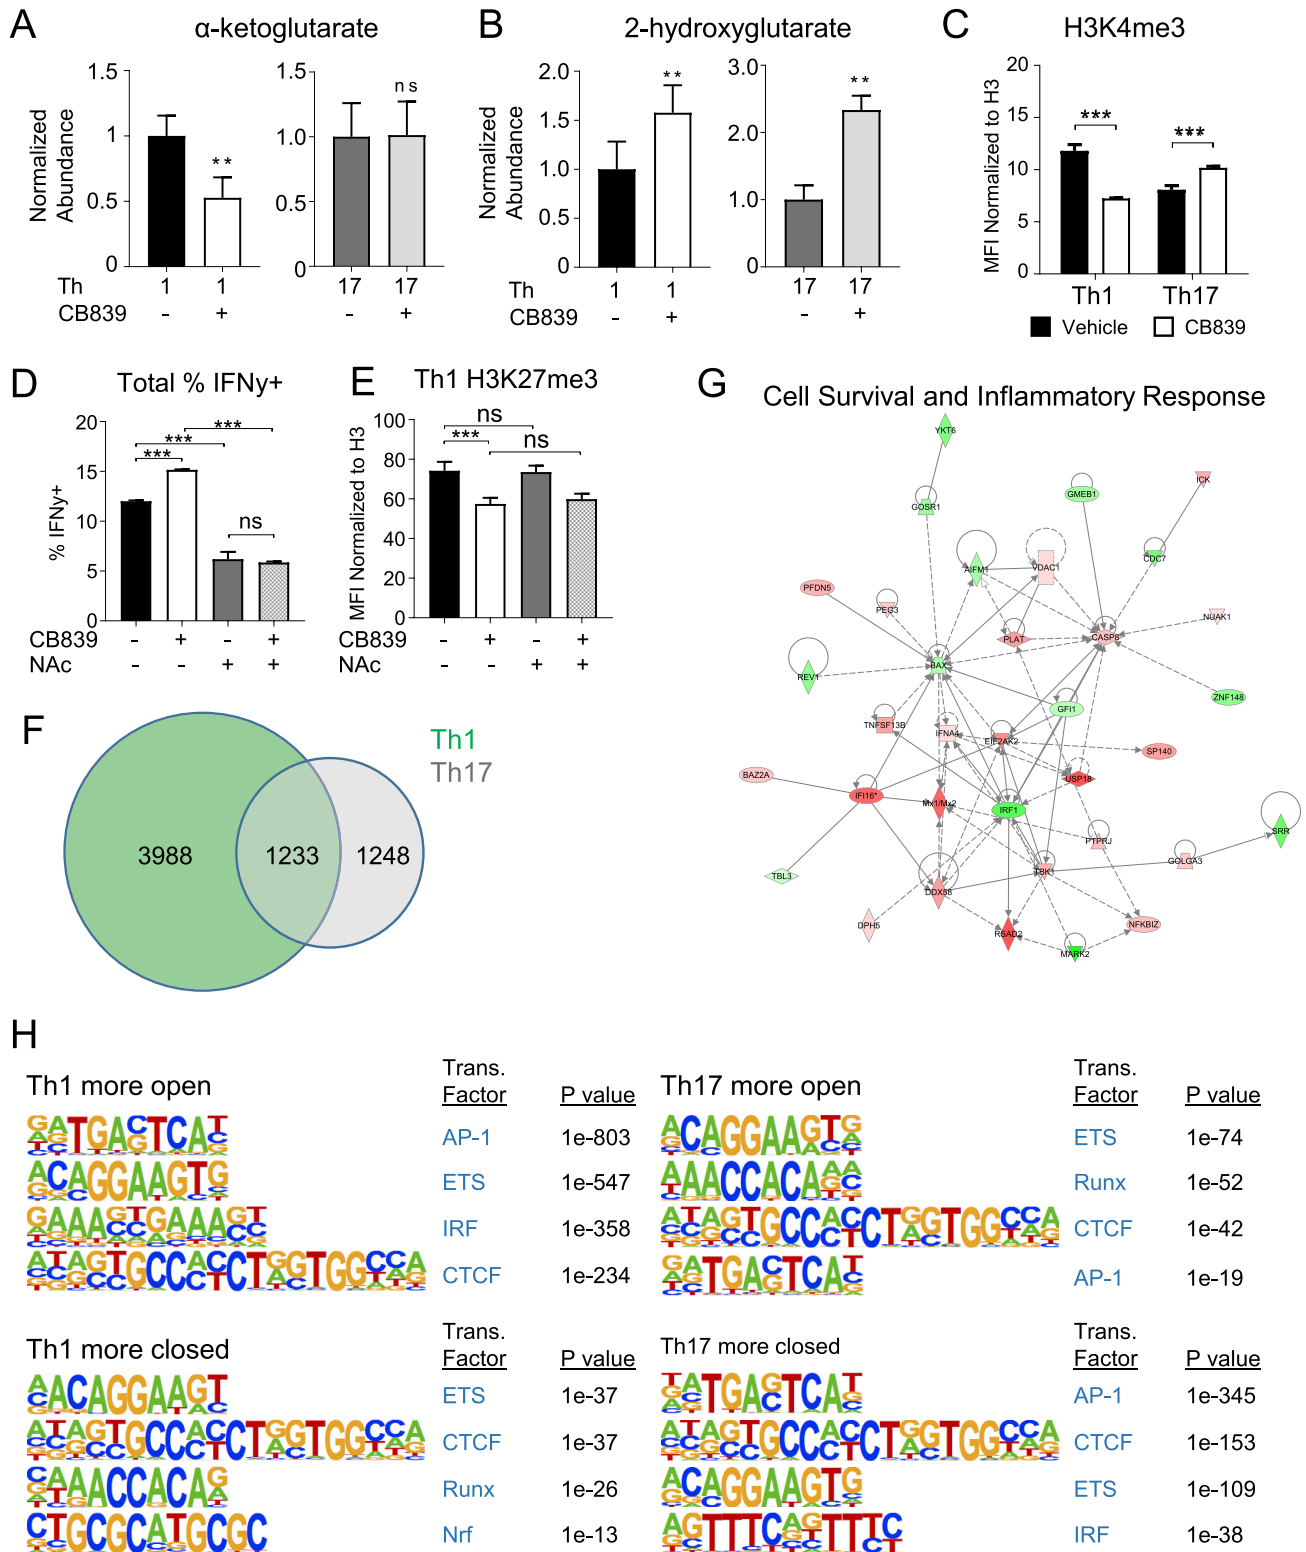

**Figure S5. GLS Deficiency Differentially Affects Th1 and Th17 T Cells and Modifies Epigenetic Landscape, Related to Figure 5**

(A and B) Metabolite levels normalized to vehicle of each subset (A) Intracellular  $\alpha$ -ketoglutarate metabolite levels and (B) 2-Hydroxyglutarate metabolite levels as in A (\*\* $p < 0.01$ , unpaired t test).

(legend continued on next page)

- 
- (C) MFI of H3K4me3 in Th1 and Th17 cells (\*\*p < 0.001, Two-way ANOVA, n = 3 replicates/group).
- (D) Percent total IFN $\gamma$ + producers in Th1 skewing conditions (\*\*p < 0.001, one-way ANOVA).
- (E) MFI of H3K27me3 in Th1 skewing conditions (\*\*p < 0.001, one-way ANOVA).
- (F) Venn diagram of ATAC-Seq total changed peaks (either open or closed).
- (G) Ingenuity pathway analysis of altered ATACseq peaks from promoter regions in Th1 cells for Cell Survival and Inflammatory response (green – downregulated, red, upregulated, relative to vehicle treated).
- (H) Motif analysis of the promoter regions with significantly changed peaks in Th1 and Th17 cells.

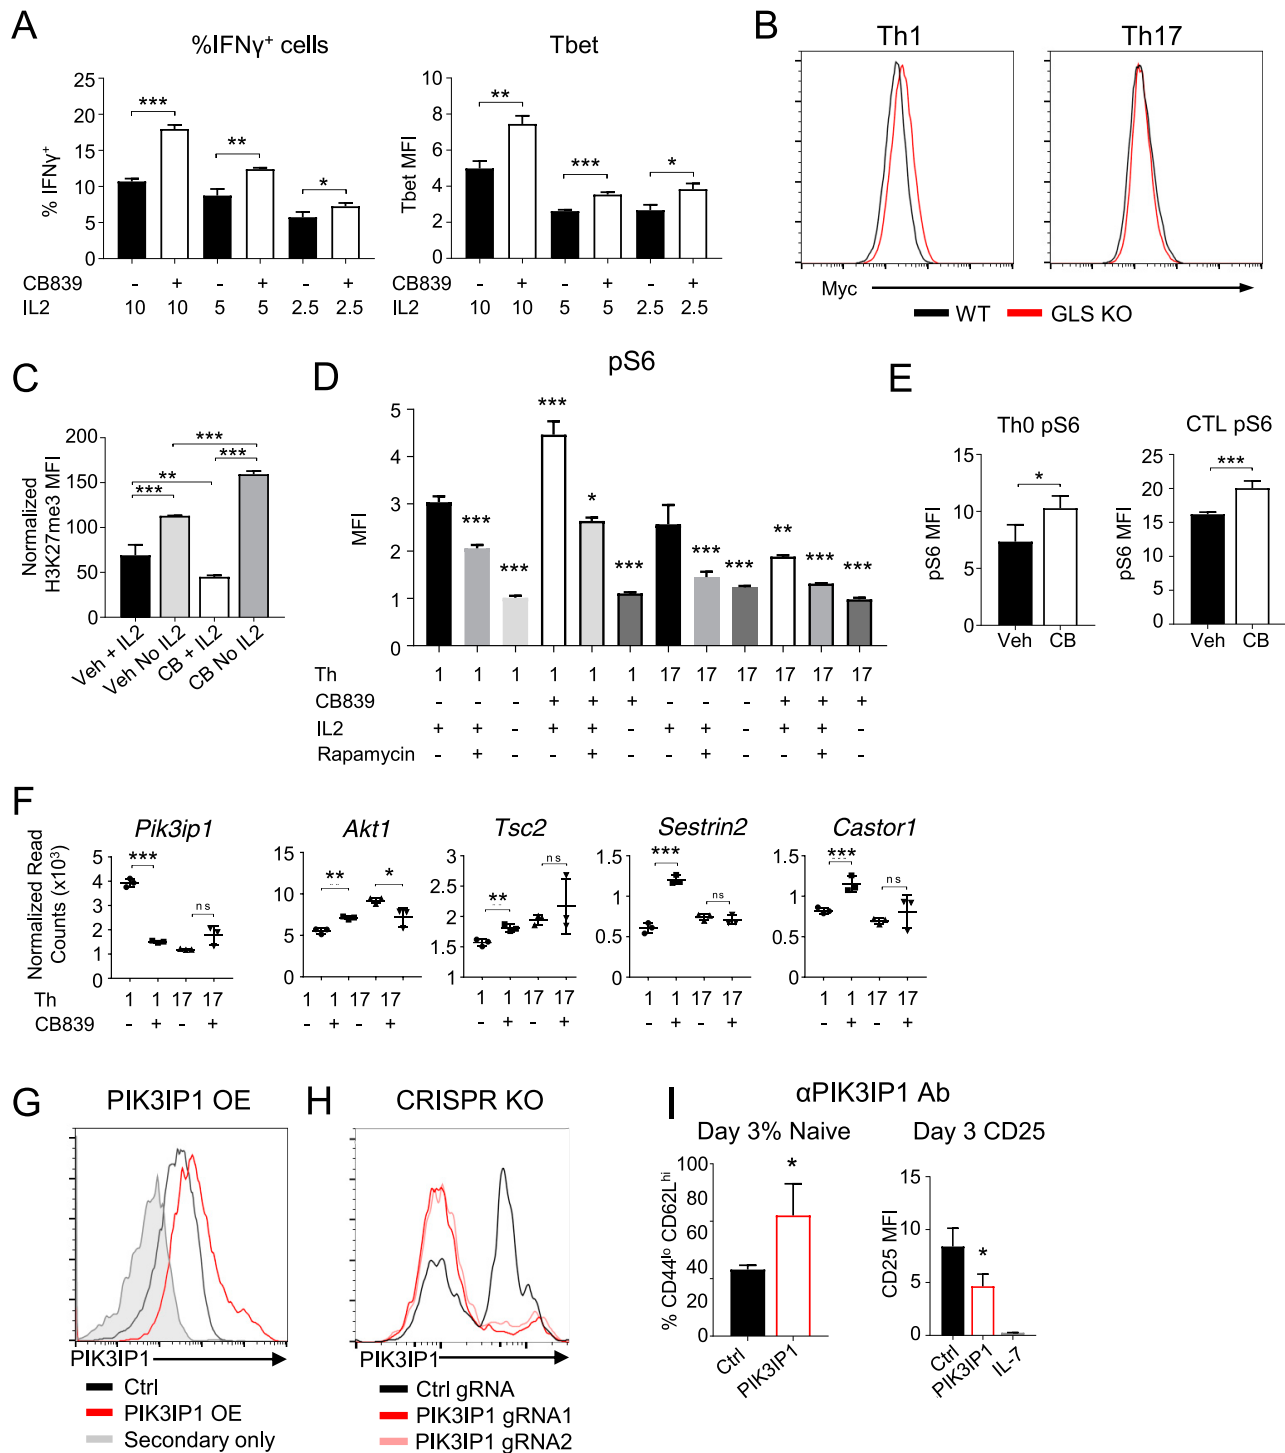

**Figure S6. Th1 Cells Are Sensitive to mTOR Signaling in GLS Deficiency, Related to Figure 6**

(A) Left: Percent IFN $\gamma$ <sup>+</sup> producers in Th1 skewing conditions treated with or without CB839 and indicated levels of IL-2 (ng/mL). Right: Tbet protein expression as in left. (\*\*p < 0.001, Student's t test).

(B) Myc protein expression in WT and GLS KO CD4<sup>+</sup> T cells in Th1 and Th17 skewing conditions (representative of n = 3 replicates).

(C) MFI of H3K27me3 normalized to total H3 of CD4<sup>+</sup> T cells in Th1 skewing conditions with indicated IL2 with or without CB839 (\*\*p < 0.001, one-way ANOVA, n = 3 replicates/group).

(legend continued on next page)

---

(D and E) phospho-S6 protein expression measured by flow cytometry (D) in IL2 and IL2 depleted conditions with or without rapamycin (\*\*p < 0.01, one-way ANOVA compared to vehicle of each group, n = 3 replicates/group) or (E) pS6 expression in Th0 (left) and CD8+ CTL cells (right) (\*\*p < 0.001 Student's t test, n = 3 replicates/group).

(F) Normalized message counts from RNA-Seq described in [Figure 6A](#), highlighting PI3K/Akt/mTOR pathway targets (\*\*p < 0.001, p values obtained from defSeq2 program).

(G) PIK3IP1 protein expression in Wild-Type CD4<sup>+</sup> T cells in Th1 skewing conditions in the presence of CB839 infected with PIK3IP1 expression plasmid (representative of n = 3 replicates).

(H) PIK3IP1 protein expression in CAS9-expressing CD4<sup>+</sup> T cells in Th1 skewing conditions with guide RNAs targeting PIK3IP1 (CRISPR KO).

(I) Percent naive cells in control or PIK3IP1 antibody-treated activated T cells (left) and CD25 expression (right) (\*p < 0.05, Student's t test, n = 3 replicates/group).

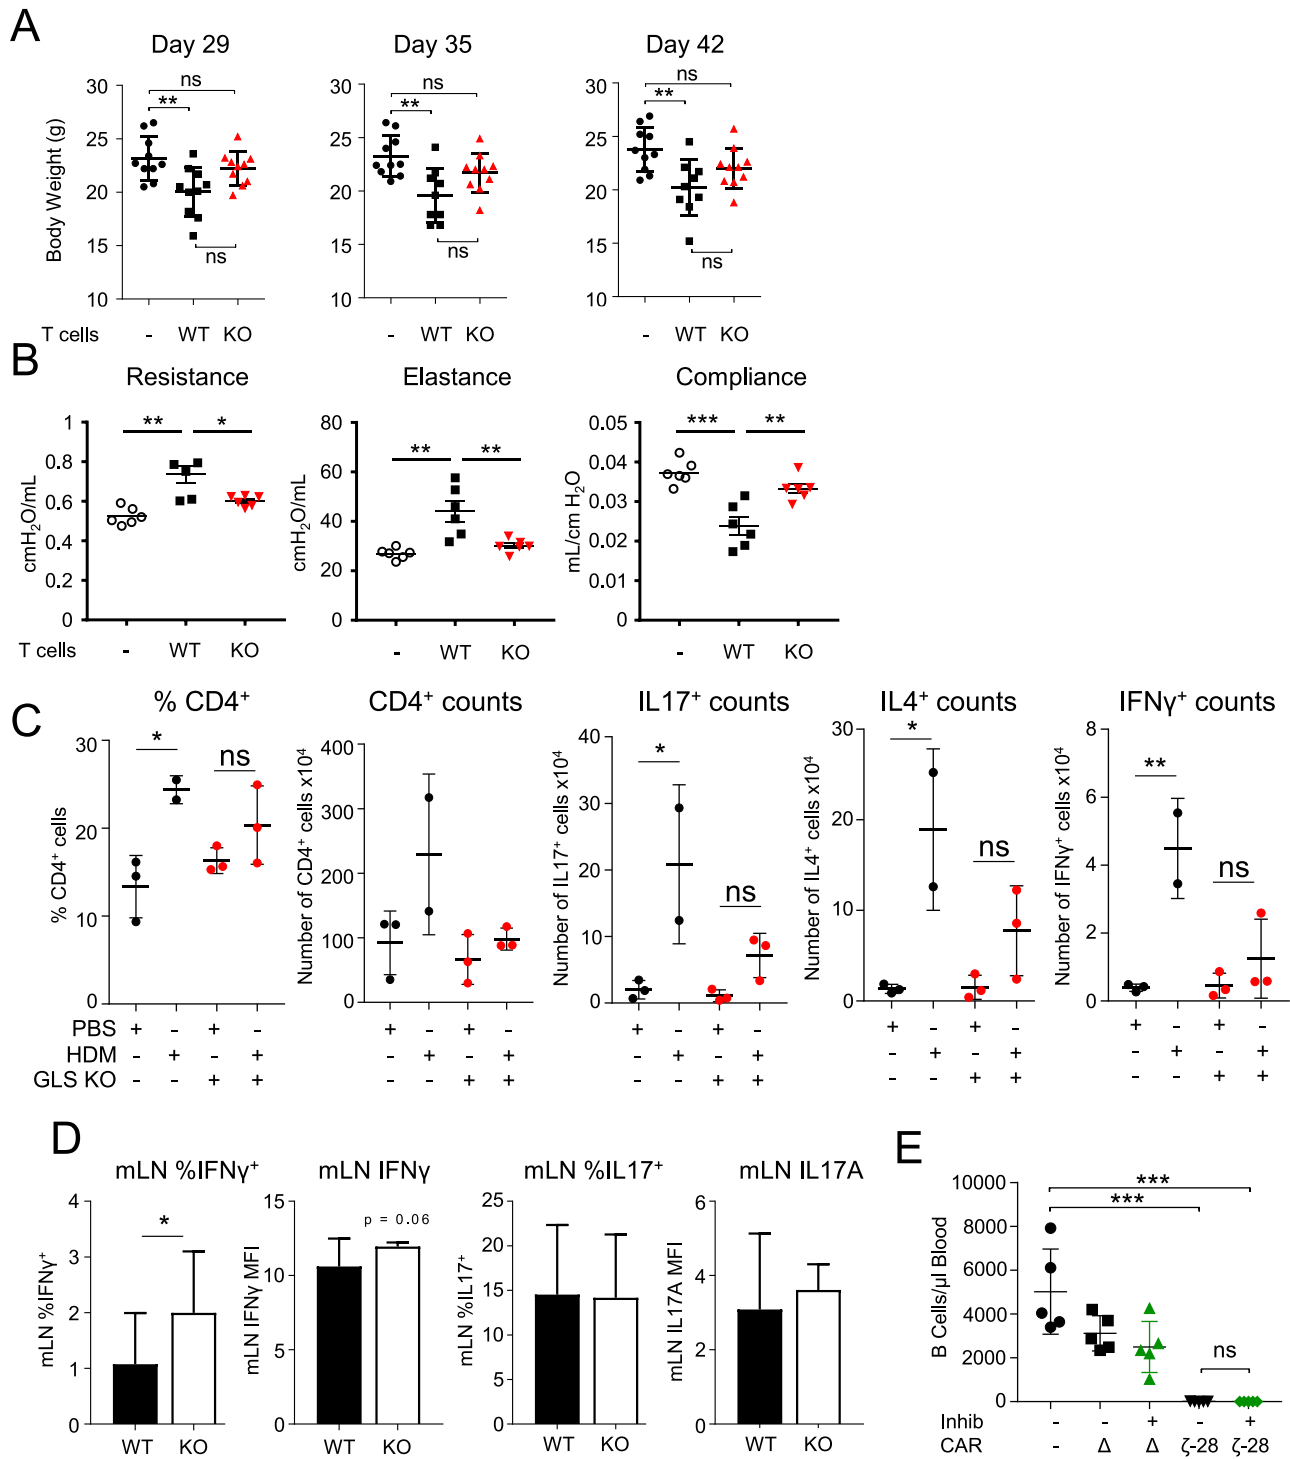

**Figure S7. GLS Is Essential *In Vivo* for Inflammation, but Transient GLS Inhibition Does Not Prevent CAR T Cell-Mediated Responses, Related to Figure 7**

(A and B) cGVHD in C57BL/6 animals as in Figure 7A. (A) Bodyweights of recipient mice injected with T cell depleted bone marrow and either WT CD4<sup>+</sup> or GLS KO CD4<sup>+</sup> T cells from spleen.  $n = 9$  animals/group (\*\* $p < 0.01$ , one-way ANOVA). (B) Lung physiology measurements (read out of Bronchiole Obliterans) from (A) (\*\* $p < 0.001$ , one-way ANOVA).

(legend continued on next page)

---

(C) Percent of CD4<sup>+</sup> T cells (left), CD4<sup>+</sup> counts, IL17<sup>+</sup> counts, IL4<sup>+</sup>, and IFN $\gamma$ <sup>+</sup> counts in WT and GLS KO mice immunized with PBS or house dust mite antigen (HDM) over 14 days (\*p < 0.05, Student's t test).

(D) Percent IFN $\gamma$ <sup>+</sup>, IFN $\gamma$  MFI, or percent IL17<sup>+</sup>, and IL17A MFI in mesenteric lymph nodes collected from RAG1 KO mice injected with wild-type or GLS KO naive CD4 T cells in IBD (\*p < 0.05, Student's t test).

(E) Frequency of CD19<sup>+</sup> B cells in blood 4 weeks after injection of T cells activated and infected with CAR T cell construct 28- $\zeta$  or control delta- $\zeta$  with (green) or without (black) GLS inhibitor (\*\*p < 0.001, one-way ANOVA).
