# Supplementary material
Source: PubMed Central journal article supplement (PMC6361668)
Supplement: NIHMS1003543-supplement-Table_1.pdf [file NIHMS1003543-supplement-Table_1.pdf]

## Supplemental Table 1. Metabolic pathways altered following CB839 treatment

| Th1 Pathway                                         | Total Hits        | Raw p        | Hits Discovered        |                                                                                                                                       |
|-----------------------------------------------------|-------------------|--------------|------------------------|---------------------------------------------------------------------------------------------------------------------------------------|
| Alanine, aspartate and glutamate metabolism         | 24                | 8            | 5.34E-08               | Fumaric acid; Pyruvic acid; Ureidosuccinic acid; L-Aspartic Acid; Arginosuccinic acid; L-glutamic acid; L-glutamine; Oxoglutaric acid |
| Citrate cycle (TCA cycle)                           | 20                | 5            | 0.0001074              | Oxoglutaric acid; L-malic acid; Pyruvic Acid; Fumaric acid; Phosphoenolpyruvate                                                       |
| D-Glutamine and D-glutamate metabolism              | 5                 | 3            | 0.00015834             | L-Glutamic acid; L-glutamine; oxoglutaric acid                                                                                        |
| Pyrimidine metabolism                               | 41                | 6            | 0.00048197             | L-Glutamine; 4,5-Dihydroorotic acid; Dihydrouracil; Cytidine monophosphate; Cytidine; Ureidosuccinic acid                             |
| Arginine and proline metabolism                     | 44                | 6            | 0.00071444             | L-Glutamine; L-Aspartic acid; Argininosuccinic acid; L-Glutamic acid; L-4-Hydroxyglutamate semialdehyde; Fumaric acid                 |
| Histidine metabolism                                | 15                | 3            | 0.0060105              | L-Glutamic acid; Methylimidazoleacetic acid; L-Aspartic acid                                                                          |
| Butanoate metabolism                                | 22                | 3            | 0.017935               | Oxoglutaric acid; Pyruvic acid; 2-Hydroxyglutarate                                                                                    |
| Pyruvate metabolism                                 | 23                | 3            | 0.020258               | Phosphoenolpyruvic acid; Pyruvic acid; L-Malic acid;                                                                                  |
| Nitrogen metabolism                                 | 9                 | 2            | 0.021285               | L-Glutamic acid; L-Glutamine;                                                                                                         |
| Cysteine and methionine metabolism                  | 27                | 3            | 0.031146               | 5'-Methylthioadenosine; 2-Aminoacrylic acid; Pyruvic acid;                                                                            |
| <b>Th17 Pathway</b>                                 | <b>Total Hits</b> | <b>Raw p</b> | <b>Hits Discovered</b> |                                                                                                                                       |
| Pentose phosphate pathway                           | 19                | 5            | 0.00433                | Deoxyribose 5-phosphate; D-Ribulose 5-phosphate; Sedoheptulose 7-phosphate; 6-Phosphogluconic acid; D-Erythrose 4-phosphate           |
| Alanine, aspartate and glutamate metabolism         | 24                | 5            | 0.01245                | Argininosuccinic acid; L-Alanine; Ureidosuccinic acid; Succinic acid; Glucosamine 6-phosphate                                         |
| Phenylalanine, tyrosine and tryptophan biosynthesis | 4                 | 2            | 0.02017                | L-Phenylalanine; L-Tyrosine                                                                                                           |
| Purine metabolism                                   | 68                | 8            | 0.04882                | Xanthine; D-Ribulose 5-phosphate; ADP; Deoxyinosine; Hypoxanthine; Guanosine triphosphate; Guanosine; Adenosine diphosphate ribose    |
