# Supplementary material
Source: PubMed Central journal article supplement (PMC6361668)
Supplement: NIHMS1003543-supplement-Table_2.pdf [file NIHMS1003543-supplement-Table_2.pdf]

## Supplemental Table 2. Gene Set Enrichment Analysis of Th1 and Th17 Cells Treated with GLS-Inhibitor

### Th1 Cells: Increased Pathways with CB839 Treatment

| Gene Set Name                   | # Genes in Gene Set (K) | Description                                                                               | # Genes in Overlap (k) | k/K    | p-value   | FDR q-value |
|---------------------------------|-------------------------|-------------------------------------------------------------------------------------------|------------------------|--------|-----------|-------------|
| HALLMARK_E2F_TARGETS            | 200                     | Genes encoding cell cycle related targets of E2F transcription factors.                   | 135                    | 0.675  | 7.54E-170 | 3.77E-168   |
| HALLMARK_G2M_CHECKPOINT         | 200                     | Genes involved in the G2/M checkpoint, as in progression through the cell division cycle. | 101                    | 0.505  | 3.74E-108 | 9.36E-107   |
| HALLMARK_MITOTIC_SPINDLE        | 200                     | Genes important for mitotic spindle assembly.                                             | 56                     | 0.28   | 4.54E-43  | 7.57E-42    |
| HALLMARK_MTORC1_SIGNALING       | 200                     | Genes up-regulated through activation of mTORC1 complex.                                  | 47                     | 0.235  | 1.53E-32  | 1.92E-31    |
| HALLMARK_MYC_TARGETS_V1         | 200                     | A subgroup of genes regulated by MYC - version 1 (v1).                                    | 43                     | 0.215  | 3.55E-28  | 3.55E-27    |
| HALLMARK_IL2_STAT5_SIGNALING    | 200                     | Genes up-regulated by STAT5 in response to IL2 stimulation.                               | 37                     | 0.185  | 5.01E-22  | 4.18E-21    |
| HALLMARK_GLYCOLYSIS             | 200                     | Genes encoding proteins involved in glycolysis and gluconeogenesis.                       | 34                     | 0.17   | 3.81E-19  | 2.72E-18    |
| HALLMARK_DNA_REPAIR             | 150                     | Genes involved in DNA repair.                                                             | 28                     | 0.1867 | 4.05E-17  | 2.53E-16    |
| HALLMARK_ESTROGEN_RESPONSE_LATE | 200                     | Genes defining late response to estrogen.                                                 | 30                     | 0.15   | 1.60E-15  | 8.01E-15    |
| HALLMARK_P53_PATHWAY            | 200                     | Genes involved in p53 pathways and networks.                                              | 30                     | 0.15   | 1.60E-15  | 8.01E-15    |

### Th1 Cells: Decreased Pathways with CB839 Treatment

| Gene Set Name                              | # Genes in Gene Set (K) | Description                                                                                     | # Genes in Overlap (k) | k/K    | p-value  | FDR q-value |
|--------------------------------------------|-------------------------|-------------------------------------------------------------------------------------------------|------------------------|--------|----------|-------------|
| HALLMARK_KRAS_SIGNALING_UP                 | 200                     | Genes up-regulated by KRAS activation.                                                          | 20                     | 0.1    | 6.52E-10 | 3.26E-08    |
| HALLMARK_COMPLEMENT                        | 200                     | Genes encoding components of the complement system, which is part of the innate immune system.  | 18                     | 0.09   | 2.43E-08 | 4.05E-07    |
| HALLMARK_INFLAMMATORY_RESPONSE             | 200                     | Genes defining inflammatory response.                                                           | 18                     | 0.09   | 2.43E-08 | 4.05E-07    |
| HALLMARK_ALLOGRAFT_REJECTION               | 200                     | Genes up-regulated during transplant rejection.                                                 | 17                     | 0.085  | 1.36E-07 | 1.70E-06    |
| HALLMARK_APICAL_JUNCTION                   | 200                     | Genes encoding components of apical junction complex.                                           | 16                     | 0.08   | 7.14E-07 | 7.14E-06    |
| HALLMARK_APOPTOSIS                         | 161                     | Genes mediating programmed cell death (apoptosis) by activation of caspases.                    | 13                     | 0.0807 | 6.99E-06 | 5.82E-05    |
| HALLMARK_INTERFERON_GAMMA_RESPONSE         | 200                     | Genes up-regulated in response to IFNG [GeneID=3458].                                           | 14                     | 0.07   | 1.61E-05 | 1.15E-04    |
| HALLMARK_ANGIOGENESIS                      | 36                      | Genes up-regulated during formation of blood vessels (angiogenesis).                            | 6                      | 0.1667 | 3.86E-05 | 2.41E-04    |
| HALLMARK_UV_RESPONSE_DN                    | 144                     | Genes down-regulated in response to ultraviolet (UV) radiation.                                 | 11                     | 0.0764 | 5.83E-05 | 2.65E-04    |
| HALLMARK_EPITHELIAL_MESENCHYMAL_TRANSITION | 200                     | Genes defining epithelial-mesenchymal transition, as in wound healing, fibrosis and metastasis. | 13                     | 0.065  | 6.88E-05 | 2.65E-04    |
| HALLMARK_ESTROGEN_RESPONSE_EARLY           | 200                     | Genes defining early response to estrogen.                                                      | 13                     | 0.065  | 6.88E-05 | 2.65E-04    |

### Th17 Cells: Increased Pathways with CB839 Treatment

| Gene Set Name                              | # Genes in Gene Set (K) | Description                                                                                     | # Genes in Overlap (k) | k/K   | p-value  | FDR q-value |
|--------------------------------------------|-------------------------|-------------------------------------------------------------------------------------------------|------------------------|-------|----------|-------------|
| HALLMARK_INTERFERON_GAMMA_RESPONSE         | 200                     | Genes up-regulated in response to IFNG [GeneID=3458].                                           | 25                     | 0.125 | 2.94E-13 | 1.47E-11    |
| HALLMARK_APICAL_JUNCTION                   | 200                     | Genes encoding components of apical junction complex.                                           | 19                     | 0.095 | 2.09E-08 | 3.48E-07    |
| HALLMARK_P53_PATHWAY                       | 200                     | Genes involved in p53 pathways and networks.                                                    | 19                     | 0.095 | 2.09E-08 | 3.48E-07    |
| HALLMARK_MYOGENESIS                        | 200                     | Genes involved in development of skeletal muscle (myogenesis).                                  | 18                     | 0.09  | 1.12E-07 | 1.40E-06    |
| HALLMARK_COMPLEMENT                        | 200                     | Genes encoding components of the complement system, which is part of the innate immune system.  | 17                     | 0.085 | 5.62E-07 | 4.01E-06    |
| HALLMARK_TNFA_SIGNALING_VIA_NFKB           | 200                     | Genes regulated by NF-kB in response to TNF [GeneID=7124].                                      | 17                     | 0.085 | 5.62E-07 | 4.01E-06    |
| HALLMARK_XENOBIOTIC_METABOLISM             | 200                     | Genes encoding proteins involved in processing of drugs and other xenobiotics.                  | 17                     | 0.085 | 5.62E-07 | 4.01E-06    |
| HALLMARK_EPITHELIAL_MESENCHYMAL_TRANSITION | 200                     | Genes defining epithelial-mesenchymal transition, as in wound healing, fibrosis and metastasis. | 16                     | 0.08  | 2.66E-06 | 1.48E-05    |
| HALLMARK_INFLAMMATORY_RESPONSE             | 200                     | Genes defining inflammatory response.                                                           | 16                     | 0.08  | 2.66E-06 | 1.48E-05    |
| HALLMARK_HYPOXIA                           | 200                     | Genes up-regulated in response to low oxygen levels (hypoxia).                                  | 15                     | 0.075 | 1.18E-05 | 5.90E-05    |

### Th17 Cells: Decreased Pathways with CB839 Treatment

| Gene Set Name                      | # Genes in Gene Set (K) | Description                                                                                                           | # Genes in Overlap (k) | k/K    | p-value   | FDR q-value |
|------------------------------------|-------------------------|-----------------------------------------------------------------------------------------------------------------------|------------------------|--------|-----------|-------------|
| HALLMARK_E2F_TARGETS               | 200                     | Genes encoding cell cycle related targets of E2F transcription factors.                                               | 107                    | 0.535  | 6.77E-130 | 3.38E-128   |
| HALLMARK_G2M_CHECKPOINT            | 200                     | Genes involved in the G2/M checkpoint, as in progression through the cell division cycle.                             | 94                     | 0.47   | 7.15E-107 | 1.79E-105   |
| HALLMARK_MYC_TARGETS_V1            | 200                     | A subgroup of genes regulated by MYC - version 1 (v1).                                                                | 75                     | 0.375  | 4.76E-76  | 7.94E-75    |
| HALLMARK_MTORC1_SIGNALING          | 200                     | Genes up-regulated through activation of mTORC1 complex.                                                              | 70                     | 0.35   | 1.64E-68  | 2.05E-67    |
| HALLMARK_MYC_TARGETS_V2            | 58                      | A subgroup of genes regulated by MYC - version 2 (v2).                                                                | 31                     | 0.5345 | 3.73E-38  | 3.73E-37    |
| HALLMARK_IL2_STAT5_SIGNALING       | 200                     | Genes up-regulated by STAT5 in response to IL2 stimulation.                                                           | 39                     | 0.195  | 7.99E-28  | 6.66E-27    |
| HALLMARK_CHOLESTEROL_HOMEOSTASIS   | 74                      | Genes involved in cholesterol homeostasis.                                                                            | 25                     | 0.3378 | 8.83E-25  | 6.31E-24    |
| HALLMARK_UNFOLDED_PROTEIN_RESPONSE | 113                     | Genes up-regulated during unfolded protein response, a cellular stress response related to the endoplasmic reticulum. | 29                     | 0.2566 | 1.17E-24  | 7.29E-24    |
| HALLMARK_TNFA_SIGNALING_VIA_NFKB   | 200                     | Genes regulated by NF-kB in response to TNF [GeneID=7124].                                                            | 34                     | 0.17   | 2.14E-22  | 1.19E-21    |
| HALLMARK_GLYCOLYSIS                | 200                     | Genes encoding proteins involved in glycolysis and gluconeogenesis.                                                   | 31                     | 0.155  | 2.53E-19  | 1.26E-18    |
